# Supplementary material for: NMR study of the supramolecular structure of dual drug-loaded poly(butylcyanoacrylate) nanoparticles
Source: Royal Society of Chemistry journal article supplement (doi:10.1039/c3cp51471d), 2013-01-01
Supplement: c3cp51471d.pdf [file c3cp51471d.pdf]

# NMR study of the supramolecular structure of dual drug-loaded poly(butylcyanoacrylate) nanoparticles

Margarita Simeonova,<sup>a</sup> Maria Rangel<sup>b</sup> and Galya Ivanova\*<sup>c</sup>

<sup>s</sup> Received (in XXX, XXX) Xth XXXXXXXXXX 20XX, Accepted Xth XXXXXXXXXX 20XX

DOI: 10.1039/b000000x

## Electronic Supplementary information (ESI):

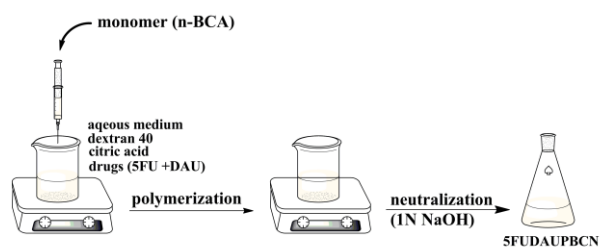

Method 1

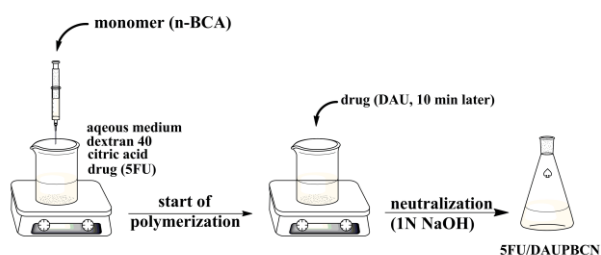

Method 2

10

**Scheme S1** Simplified schematic representation of the preparation of the dual drug loaded PBCN, 5FU/DAUPBCN and 5FU/DAUPBCN.

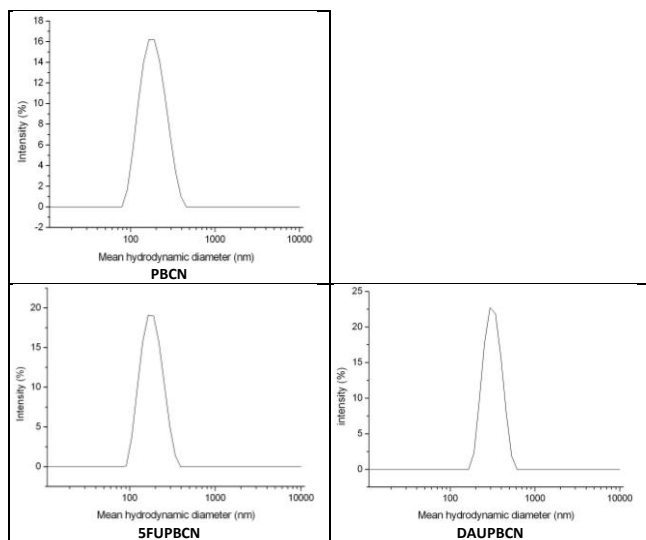

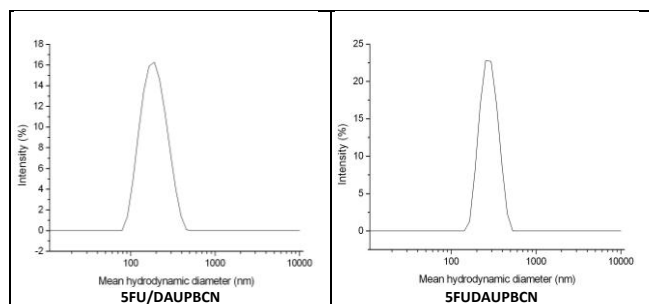

Figure S1 Size distribution by intensity of the samples studied.

5

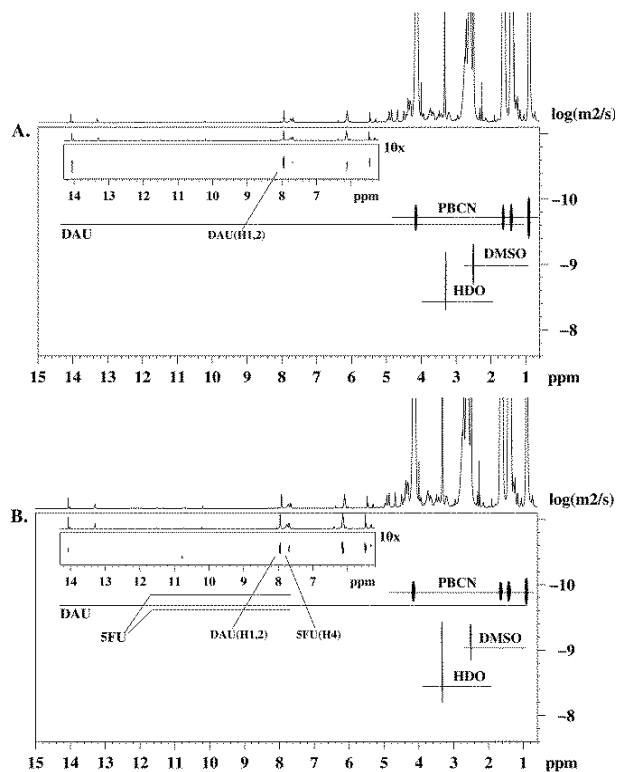

Figure S2 400 MHz 2D DOSY spectra in DMSO-d<sub>6</sub> of: A. 5FU/DAUPBCN and B. 5FU/DAUPBCN.

10
